# Supplementary material
Source: publisher figshare collection journal article supplement (https://gsapubs.figshare.com/ndownloader/files/23307830)
Supplement: Supplementary file 1 [file 23307830]

## Sheet: U Th Pb data
Errors are 1s unless otherwise specified
Spot Name	Hours	Bkrd cts /sec	total 196 cts /sec	total 204 cts /sec	total 204.1 cts /sec	total 206 cts /sec	total 238 cts /sec	204 /206	% err	207 /206	% err	208 /206	% err	238 /196	% err	206 /238	% err	254 /238	% err	248 /254	% err	206 /270	% err	270 /254	% err	206 /254	% err	206Pb /238U calibr. const	% err	overcount-corrected-cor % com 206	208Pb* /206Pb*	% err	ppm U	ppm Th	Th/U	ppm Rad 206	232Th /238U	% err	total 206Pb /238U	% err	total 208Pb /232Th	% err	204corr 206Pb /238U Age	1s err	2s err	207corr 206Pb /238U Age	1s err	2s err	208corr 206Pb /238U Age
9855-8.2	0.817	0	2272.76	0.184766	0	649.276	1127.35	0.000236635	35.2105	0.112793	1.06555	0.192705	2.82902	0.489021	1.30774	0.577906	0.663396	6.49764	0.757797	0.554469	0.886338	0.229371	0.765221	0.387527	0.796008	0.0887037	0.70429	0.0135413	0.610157	0.410183	0.184691	2.82902	529.89	310.563	0.586089	92.3856	0.60543	0.690521	0.203803	1.17145	0.0648693	3.13887	1191.24	12.8385	25.6771	1149.19	13.0998	26.1995	1189.25
9855-95.1	4.067	0	2399.02	0.0809289	0	17.2776	3928.34	0.00190785	46.0637	0.134655	5.97002	0.213627	16.7046	1.63942	1.13961	0.00433242	2.17897	6.64786	0.396767	0.00105073	8.19288	0.00164123	2.33146	0.391626	0.413479	0.000645657	2.27945	8.00733e-05	0.4182	3.30708	0.147796	16.7046	1750.74	1.95258	0.00111529	2.23231	0.00115209	8.18038	0.00153513	1.08392	0.284652	18.6316	9.56171	0.182715	0.36543	8.85885	0.134073	0.268146	8.90283
9855-36.1	4.45	0.0666667	2321.97	0.107693	0.0666667	15.1707	2929.97	0.00301493	47.9143	0.225597	5.14735	0.413604	12.6047	1.21776	1.1701	0.00524561	2.323	6.63004	0.621337	0.0015653	7.81651	0.00204514	2.47422	0.386567	0.48271	0.000792272	2.42072	0.000121872	0.38432	5.22608	0.318494	12.6047	1294.09	2.14711	0.00165917	1.93241	0.00171392	7.80244	0.00183423	1.07131	0.442635	14.8629	11.1965	0.318942	0.637883	9.31864	0.189896	0.379793	9.53258
9855-23.1	1.133	0.133333	2180.59	0.22566	0.133333	19.3794	4021.25	0.00327629	109.272	0.1782	5.17683	0.361916	12.149	1.85138	1.69146	0.00474451	2.0971	6.85442	0.442464	0.000945776	8.33609	0.00170739	2.25598	0.401709	0.464217	0.000688267	2.21	9.77516e-05	0.389574	5.67913	0.254953	12.149	1862.64	1.88414	0.00101154	2.22026	0.00104492	8.32003	0.00147121	1.0732	0.509563	14.7639	8.93921	0.5955	1.191	8.00414	0.13407	0.268139	7.8753
9855-25.1	1.433	0	2076.42	0.210389	0	18.2122	3627.62	0.00487712	58.4501	0.197566	5.04124	0.423004	12.0674	1.59142	1.2114	0.00503236	2.11263	6.8137	0.458422	0.00173632	6.44926	0.0018563	2.23333	0.396913	0.482329	0.000737972	2.19438	0.000108212	2.035	8.45399	0.264593	12.0674	1673.55	3.09914	0.00185183	2.14337	0.00191294	6.44475	0.00162864	2.26743	0.360137	13.8671	9.60416	0.561866	1.12373	8.62097	0.230904	0.461808	8.41898
9855-93.1	4.4	0	2341.06	0.2	0	30.4676	3492.4	0.00796539	22.5908	0.162843	3.90749	0.270167	10.2377	1.49661	1.16255	0.00963999	3.83716	6.86013	0.419006	0.0101665	2.73767	0.00336649	2.37618	0.395976	0.432423	0.00134197	2.30445	0.000155358	0.450182	13.8072	-0.0291054	10.2377	1562.92	16.9761	0.0108618	3.4466	0.0112203	2.71867	0.00297846	1.09666	0.0717166	10.6492	16.5281	0.624184	1.24837	16.5438	0.231283	0.462567	16.7808
9855-35.1	3.5	0.0666667	2220.41	0.304477	0.0666667	24.6391	3881.28	0.00916791	28.4696	0.21556	4.13132	0.354309	17.2752	1.69242	1.18252	0.00641871	1.81794	6.72208	0.401325	0.00158964	6.58778	0.0024125	1.92659	0.393825	0.416356	0.000952636	1.88744	0.000141423	0.281349	15.8917	0.0172186	17.2752	1804.52	3.05483	0.00169287	2.77501	0.00174874	6.57921	0.00212848	1.03883	0.431249	18.5148	11.5302	0.631122	1.26224	10.9747	0.183437	0.366873	11.4405
9855-44.1	1.683	0.0784854	2136.76	0.24111	0.0784854	15.6503	3519.11	0.0101517	44.4374	0.181003	5.5562	0.418125	12.3577	1.63903	1.19677	0.00440454	2.27419	6.5781	0.418772	0.000976637	8.87222	0.00172273	2.43227	0.385914	0.438953	0.000665456	2.38029	8.08673e-05	2.43877	17.597	0.0507642	12.3577	1762.03	1.82529	0.0010359	1.93366	0.00107008	8.84669	0.00155035	2.63583	0.605784	15.4248	8.23027	0.810061	1.62012	8.40154	0.25097	0.50194	8.03629
9855-43.1	2	0	2313.75	0.261589	0	19.5219	3549.7	0.0120438	25.1296	0.240584	4.39025	0.476044	10.4153	1.5236	1.15769	0.00535917	2.06768	6.9321	0.41306	0.00102684	12.7692	0.00189898	2.21265	0.402565	0.42307	0.000768402	2.16315	8.80415e-05	1.85326	20.8767	0.0374307	10.4153	1583.2	1.74819	0.00110421	1.81626	0.00114065	12.686	0.00168789	2.10584	0.704432	16.5484	8.60354	0.598133	1.19627	8.38362	0.222333	0.444666	8.45447
9855-70.1	6.6	0	2351.3	0.251626	0	13.6003	2971.5	0.0131274	31.4414	0.23112	5.36144	0.495312	12.1521	1.23099	1.16091	0.00456375	2.4478	6.82943	0.812396	0.00116998	8.72752	0.00163852	2.61159	0.403607	0.461641	0.000663069	2.55703	7.72173e-05	1.60537	22.7551	0.0112852	12.1521	1270.17	1.58854	0.00125065	1.24766	0.00129193	8.71115	0.00148037	1.89135	0.567562	15.071	7.36735	0.696058	1.39212	7.45962	0.198141	0.396281	7.3299
9855-42.1	0.65	0	2164.27	0.133333	0	10.4996	2631.73	0.013457	23.0148	0.148062	7.41477	0.308804	17.8533	1.20401	1.22916	0.00398057	2.79513	6.57011	0.485968	0.00109127	9.96482	0.00154073	2.98301	0.390168	0.506608	0.000603067	2.92057	7.18034e-05	0.523991	23.3264	-0.247813	17.8533	1296.65	1.50035	0.0011571	1.17561	0.00119528	9.94553	0.00137658	1.12897	0.355643	20.4678	6.80044	0.482048	0.964096	7.8043	0.144578	0.289156	7.58941
9855-65.1_A	3.617	0	2228.43	0.10618	0	6.37245	1647.59	0.0136528	38.8588	0.287941	7.2811	0.46272	18.708	0.723994	1.24716	0.00388522	3.55109	6.44214	0.607896	0.00121595	11.9303	0.00159295	3.78405	0.377757	0.639732	0.000603186	3.70821	7.54216e-05	1.20903	23.6658	-0.0567894	18.708	791.384	1.01889	0.00128748	0.75033	0.00132997	11.8792	0.00144595	1.569	0.503071	22.2163	7.11132	0.863486	1.72697	6.66281	0.252647	0.505294	7.30151
9855-8.1	0.533	0.0666667	2109.69	0.2	0.0666667	9.46101	2002.79	0.0164449	37.3596	0.304488	7.62541	0.672475	13.1773	0.922328	1.22993	0.00465131	3.77184	6.7715	0.588283	0.0009589	13.416	0.00173018	4.08127	0.396168	0.61	0.000685567	3.98346	0.000100781	4.02267	28.5056	0.0879955	13.1773	984.671	1.01664	0.00103247	0.917245	0.00106654	13.2764	0.0015168	4.1451	0.956375	19.1595	6.98689	1.0797	2.15941	6.79875	0.388288	0.776576	6.70059
9855-35.2	3.817	0.0666667	2242.38	0.493538	0.0666667	24.6287	4453.76	0.0180112	19.7202	0.241319	3.93241	0.474396	9.53908	1.94087	1.15905	0.00551314	1.81584	6.81729	0.374757	0.000847103	8.4501	0.00199429	1.94012	0.40285	0.385248	0.000805613	1.90019	0.000117785	1.70297	31.2207	-0.280938	9.53908	2075.17	1.87734	0.000904668	2.17342	0.000934522	8.44199	0.00177272	1.97487	0.899892	12.8904	7.85508	0.719616	1.43923	8.79485	0.215461	0.430923	8.88758
9855-21.1	6.933	0	2431.77	0.332417	0	15.6674	3113.55	0.0195024	22.0071	0.221937	5.03396	0.47123	11.5027	1.24455	1.13118	0.00508176	2.26368	6.79641	0.440801	0.00104741	9.66297	0.00188368	2.41911	0.393369	0.45439	0.000743301	2.36845	8.57127e-05	0.474571	33.8055	-0.380191	11.5027	1310.72	1.46603	0.00111849	1.2247	0.0011554	9.65587	0.00164324	1.1069	0.670198	15.059	7.0082	0.791031	1.58206	8.39442	0.167402	0.334804	8.25483
9855-94.1	4.733	0	2403.16	0.245476	0	7.46178	1263.71	0.0260781	22.9555	0.427787	5.80255	1.1339	11.4392	0.531332	1.45154	0.00575329	3.3718	6.73919	0.683447	0.0024513	9.34386	0.0021211	3.62693	0.396348	0.701927	0.000846285	3.54609	0.000100044	0.546128	45.2037	0.305244	11.4392	564.996	1.47286	0.00260686	0.51008	0.00269288	9.33685	0.001918	1.13941	0.807616	14.8098	6.77157	1.28397	2.56794	6.80196	0.369461	0.738922	5.80773
																																		0.362183
																																Common Pb
																															206/204	17.334		207/204		15.5139
																															207/206	0.895		208/204		37.067
																															208/206	2.1384
[truncated: 29 more columns]

## Sheet: Standard data
Spot Name	Date/Time	Hours	Bkrd cts /sec	total 196 cts /sec	total 204 cts /sec	total 204.1 cts /sec	total 206 cts /sec	total 238 cts /sec	204 /206	% err	207 /206	% err	208 /206	% err	238 /196	% err	206 /238	% err	254 /238	% err	248 /254	% err	206 /270	% err	270 /254	% err	206 /254	% err	Ln UO/U	% err	Ln Pb/U	% err	Expo	Expo_Used	SqidNum	4-corr 206Pb /238U calibr. const	% err	Age (Ma)	±1s		% com 206	ppm U	ppm Th	232Th /238U	204 overcts /sec. (fr. 207)	204 overcts /sec. (fr. 208)	208Pb* /206Pb*	% err	204Pb /206Pb (fr. 207)
6266-2.1	2009-06-26, 11:49	0	0.133333	2169.18	0.179536	0.133333	518.25	1907.01	0.000269953	30.1181	0.0603156	2.03202	0.0832383	4.70273	0.856773	1.26729	0.275717	0.689357	6.74408	0.652538	0.194548	1.00363	0.104045	0.742859	0.393177	0.658473	0.0408739	0.722769	1.90869	0.322116	-1.28835	0.529757	1.49915	2	0.15	0.00603183	0.465171	560.16	2.4957	4.9914	0.467936	894.895	185.43	0.214047	-0.00479268	-0.23125	0.0735762	4.70273	9.84253e-05
6266-1.1	2009-06-26, 13:59	2.167	0.0809289	2358.61	0.195825	0.0809289	560.519	2047.2	0.000173255	53.6808	0.0624361	1.48992	0.0753947	4.79134	0.87396	1.20994	0.272608	0.561192	6.66199	0.576038	0.196832	0.943451	0.104573	0.633828	0.391008	0.605754	0.0409761	0.603309	1.89644	0.292098	-1.2997	0.429064			2.167	0.00608103	0.552053	564.535	2.98397	5.96794	0.30032	932	194.928	0.216052	-0.0222609	-0.0355819	0.0691804	4.79134	0.000244732
6266-16.1	2009-06-26, 14:15	2.433	0	2343.98	0.366667	0	545.101	2007.36	0.00078357	18.9904	0.0665952	1.46239	0.086546	4.50682	0.860392	1.21202	0.26975	0.566959	6.61768	0.579041	0.196721	0.950933	0.104273	0.640568	0.389651	0.610423	0.04063	0.607749	1.88984	0.294799	-1.31036	0.430289			2.433	0.00608051	0.525345	564.488	2.83938	5.67876	1.35824	922.019	192.452	0.215617	0.0768327	0.0262435	0.0582931	4.50682	0.000531707
6266-6.1	2009-06-26, 14:31	2.7	0	2338.18	0.241512	0	534.443	2047.88	0.000293385	32.0266	0.0649392	1.49189	0.0792035	4.77863	0.870597	1.20305	0.260454	0.564923	6.6056	0.574327	0.198832	0.937883	0.101019	0.637573	0.391084	0.604243	0.0395292	0.606946	1.88788	0.29227	-1.34539	0.41717			2.7	0.00596167	0.41893	553.916	2.22362	4.44724	0.508554	934.551	197.089	0.217851	0.0184146	0.0431901	0.0686778	4.77863	0.00041744
6266-13.1	2009-06-26, 18:19	6.5	0.0666667	2455.55	0.279934	0.0666667	561.6	2039.5	0.000353111	29.8621	0.0629462	1.4795	0.0711412	4.9149	0.858045	1.18652	0.276864	0.756287	6.71874	0.541281	0.197341	0.90295	0.104597	0.839221	0.394285	0.560484	0.0408184	0.572911	1.90491	0.280758	-1.29375	0.428492			6.5	0.0060376	0.425646	560.673	2.28565	4.5713	0.612083	890.548	187.12	0.217051	0.0560787	0.14332	0.0584099	4.9149	0.000279927
6266-15.1	2009-06-26, 19:24	7.583	0	2360.62	0.347596	0	539.741	2018.42	0.000617103	19.9904	0.0631845	1.50901	0.0807662	4.72091	0.829295	1.18589	0.273855	0.756225	6.69405	0.7387	0.195642	0.912029	0.103182	0.624142	0.394862	0.562984	0.0408386	0.580319	1.89241	0.283819	-1.30484	0.43007			7.583	0.00602843	0.565305	559.857	3.03136	6.06272	1.06969	889.204	184.722	0.214594	0.18763	0.103534	0.058518	4.72091	0.000296374
6266-13.2	2009-06-26, 20:45	8.933	0	2286.68	0.2	0	518.431	1959.91	0.000369585	27.1208	0.0608193	1.57743	0.0752876	9.34524	0.851631	1.22133	0.265185	0.575866	6.62792	0.555743	0.200689	0.923319	0.102793	0.643657	0.388833	0.578474	0.03996	0.595689	1.89134	0.290184	-1.32726	0.433066			8.933	0.00598635	0.639522	556.113	3.40738	6.81477	0.640639	910.832	194.049	0.220076	0.130958	0.082927	0.0619852	9.34524	0.000133175
6266-14.1	2009-06-26, 21:49	10	0	2385.16	0.148503	0	522.682	1980.59	0.000232367	30.4825	0.0615	1.54941	0.0708948	5.10867	0.834281	1.18901	0.262297	0.569314	6.6391	0.550704	0.200985	0.916061	0.100291	0.633963	0.393269	0.572942	0.0394933	0.588724	1.89299	0.287565	-1.33818	0.42472			10	0.00587458	0.545081	546.158	2.85438	5.70877	0.402786	890.316	189.934	0.220373	0.0543444	0.104413	0.0625335	5.10867	0.000180144
6266-14.2	2009-06-26, 22:54	11.083	0	2328.81	0.133333	0	516.896	2030.67	0.000245782	33.3511	0.0612618	1.5627	0.0742904	5.0149	0.844495	1.18873	0.257837	0.566728	6.5473	0.54389	0.198259	0.910312	0.101336	0.633838	0.387701	0.56802	0.0393576	0.587281	1.87906	0.285808	-1.35541	0.4172			11.083	0.00598127	0.660012	555.661	3.51382	7.02763	0.426038	892.726	187.391	0.216835	0.0487138	0.0165075	0.0654588	5.0149	0.000163707
6266-1.2	2009-06-26, 23:27	11.633	0.0524044	2176.6	0.118164	0.0524044	532.584	2029.99	8.7548e-05	103.416	0.0602061	1.55796	0.0732338	4.98735	0.904592	1.23071	0.266681	0.564459	6.59481	0.544209	0.196853	0.912272	0.103489	0.629159	0.390104	0.566664	0.0403981	0.582905	1.8863	0.284824	-1.32165	0.426355			11.633	0.00611402	0.417655	567.466	2.26873	4.53746	0.151756	972.161	202.937	0.215637	0.0173714	-0.0430816	0.0700951	4.98735	9.08646e-05
6266-13.3	2009-06-29, 10:06	70.283	0	2264.72	0.0892025	0	506.364	1934.95	0.00012732	16.0478	0.0619282	1.57845	0.0780536	4.99345	0.854078	1.22418	0.26412	0.790152	6.6676	0.557761	0.198274	0.930595	0.100677	0.876072	0.391224	0.579202	0.0390601	0.599199	1.89725	0.290509	-1.34211	0.431482			70.283	0.00583346	0.397439	542.491	2.06785	4.13569	0.220697	910.2	191.804	0.217681	-0.016977	-0.0811738	0.0734964	4.99345	0.00020969
						0.030303																												0	559										0.048229	0.0143021
																																		71	559										0.0609787	0.100331
																																			Wtd Mean of Std Pb/U calibr.	0.00601879									0.0421432	0.0693399
																																			1s error of mean	0.362183
																																			1s external spot-to-spot error	0.983895
																																			MSWD	5.43551
																																			Prob. of fit	1.7184e-07
																																			rejected spot #s	11
[truncated: 14 more columns]
